# Supplementary material for: CoMnxOy nanosheets with molecular-scale homogeneity: an excellent catalyst for toluene combustion
Source: Royal Society of Chemistry journal article supplement (doi:10.1039/c7cy01867c), 2017-11-27
Supplement: c7cy01867c1.pdf [file c7cy01867c1.pdf]

## Electronic supplementary information

### **CoMn<sub>x</sub>O<sub>y</sub> nanosheets with molecular scaled homogeneity: An excellent catalyst for toluene combustion**

Yu Wang <sup>a</sup>, Limin Guo <sup>a,\*</sup>, Mengqiu Chen <sup>a</sup>, Chuan Shi <sup>b,\*</sup>

<sup>a</sup> School of Environmental Science and Technology, Huazhong University of Science and Technology, Wuhan 430074, PR China

<sup>b</sup> Laboratory of Plasma Physical Chemistry, Dalian University of Technology, Dalian 116024, PR China

#### **Experimental**\_\_\_\_\_

\* Corresponding author Tel.: +86 02787792101.

*E-mail address:* [lmguo@hust.edu.cn](mailto:lmguo@hust.edu.cn) (L. M. Guo).

\* Corresponding author Tel.: +86 041184986083.

*E-mail address:* [chuanshi@dlut.edu.cn](mailto:chuanshi@dlut.edu.cn) (C. S).

## Catalyst Characterization

X-ray powder diffraction (XRD) analysis was conducted using an x`pert3 powder equipment (PANalytical B.V., Netherlands) with Cu K $\alpha$  radiation. The loading amount of the catalysts was determined by inductively coupled plasma-atomic emission spectroscopy (ICP-AES, Optima 2000DV, USA). The N<sub>2</sub> sorption measurements were performed using physisorption (ASAP 2020, Micromeritics, USA) at -196 °C. The mesopore specific surface area and the pore size distribution were calculated using the Brunauer-Emmett-Teller (BET) and Barrett-Joyner-Halenda (BJH) methods, respectively. The micropore specific surface area and volume from the micropore were calculated by the t-plot method. The pore volume was calculated according to the adsorption amount of N<sub>2</sub> at  $P/P_0$  (the relative pressure) = 0.995. TEM images were obtained on a JEOL-2010F electron microscope operated at 200 kV. XPS analysis was performed on an AXIS-ULTRA DLD-600W spectrometer (Shimadzu, Japan) using Al K $\alpha$  radiation as the excitation source. The binding energies were calculated with respect to the C (C,H) component of the C 1s peak fixed at 284.8 eV. H<sub>2</sub> temperature programmed reduction (H<sub>2</sub>-TPR) and O<sub>2</sub>-TPD experiments were carried out on a chemical adsorption analyzer (Autochem II 2920, Micromeritics). Before TPR measurement, ca. 30 mg of catalyst (40-60 mesh) was loaded to a quartz fixed-bed U-shaped microreactor (i.d. = 4 mm) and pretreated in an O<sub>2</sub> flow of 50 mL/min at 360 °C for 1 h. After being cooled at the same atmosphere to room temperature (RT) and then purged with a N<sub>2</sub> flow of 50 mL/min for 15 min, the pretreated sample was finally exposed to a flow (50 mL/min) of 5% H<sub>2</sub>/Ar mixture and heated from RT to 550 °C at a ramp of 10 °C/min. O<sub>2</sub>-TPD analysis: 50 mg catalyst was heated to 110 °C and purged with He for 1 h to remove surface H<sub>2</sub>O. After being

cooled at the same atmosphere to room temperature (RT) and then purged with a O<sub>2</sub> flow of 50 mL/min for 1 h, followed just by the flow of He for 1 h to remove physical absorption oxygen. Then the catalyst was heated from 100 to 600 °C at a rate of 10 °C min.

**Table S1.** Preparation conditions, BET surface areas, pore volumes, average pore sizes, and H<sub>2</sub> consumption of the Co<sub>3</sub>O<sub>4</sub> and MnO<sub>2</sub> catalysts.

| Catalyst                       | Preparation method | $S_{\text{BET}}^a$<br>(m <sup>2</sup> /g) | $P_v^b$<br>(cm <sup>3</sup> /g) | APD <sup>c</sup><br>(nm) | H <sub>2</sub> consumption <sup>d</sup><br>(mmol/g) |
|--------------------------------|--------------------|-------------------------------------------|---------------------------------|--------------------------|-----------------------------------------------------|
| Co <sub>3</sub> O <sub>4</sub> | prec.              | 20                                        | 0.035                           | 36.1                     | 15.7                                                |
| MnO <sub>2</sub>               | prec.              | 14                                        | 0.031                           | 40.6                     | 6.8                                                 |

<sup>a</sup> BET specific surface areas determined from the linear part of the BET equation ( $P/P_0 = 0.05-0.25$ ). <sup>b</sup> The total adsorption pore volume at  $P/P_0 = 0.995$ . <sup>c</sup> Average pore diameter (APD). <sup>d</sup> The data were estimated by quantitatively analyzing the H<sub>2</sub>-TPR profiles.

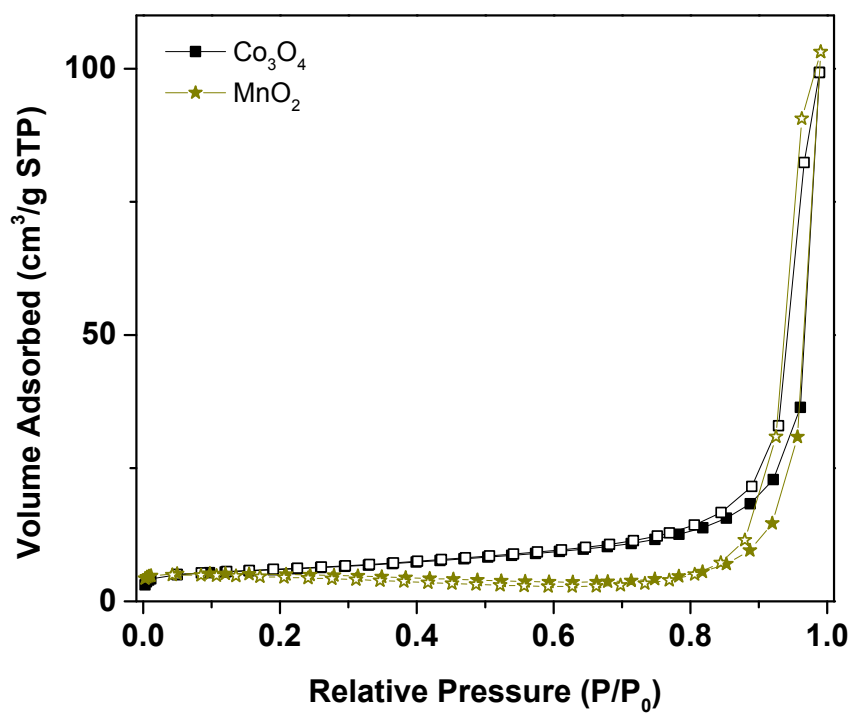

**Fig. S1.**  $\text{N}_2$  adsorption-desorption isotherms curves of the as-synthesized  $\text{Co}_3\text{O}_4$  and  $\text{MnO}_2$  catalysts.

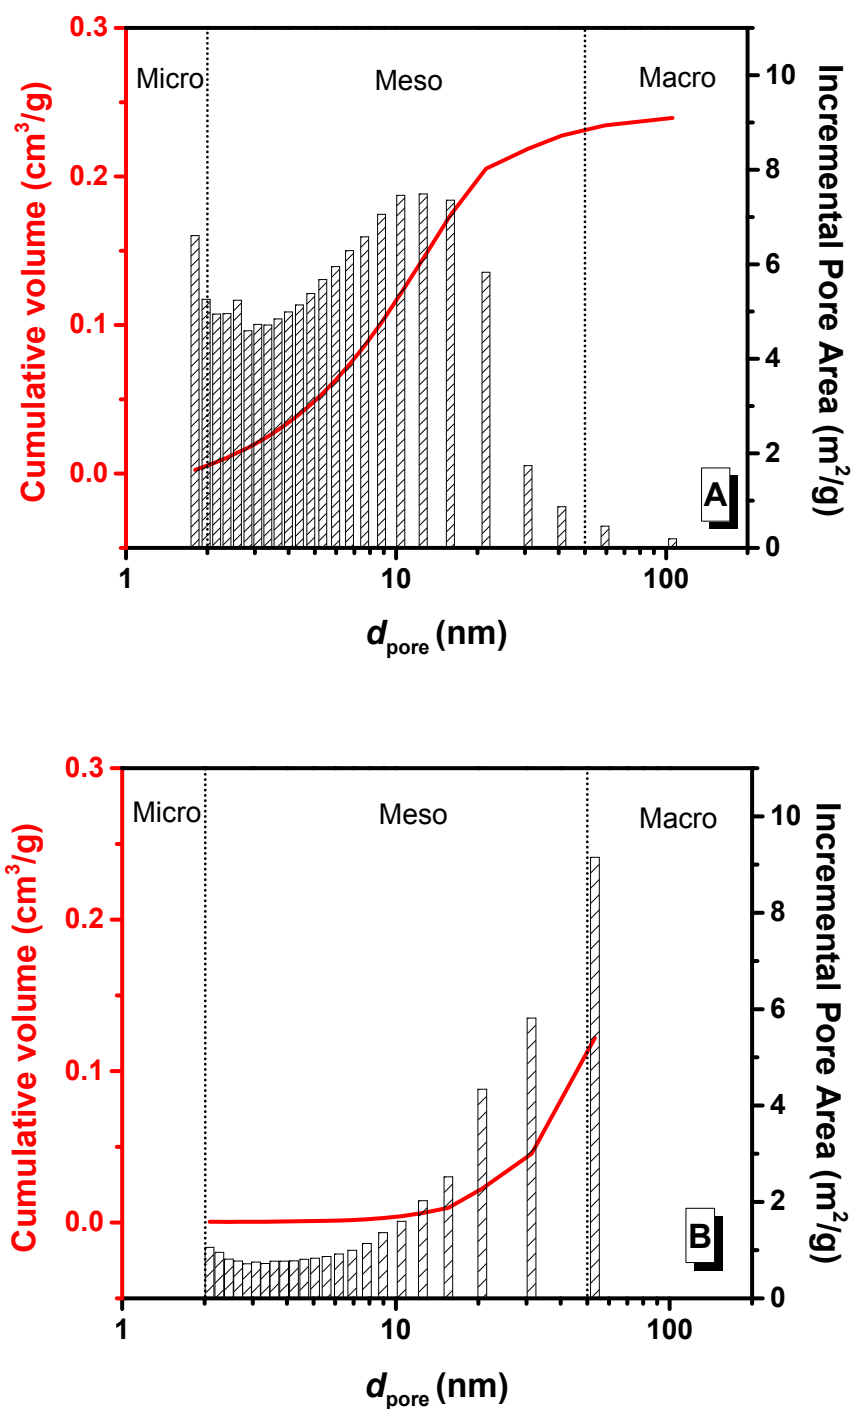

**Fig. S2.** Pore size distribution (PSD) of the (A) C3M1-R and (B) C3M1-C catalysts.

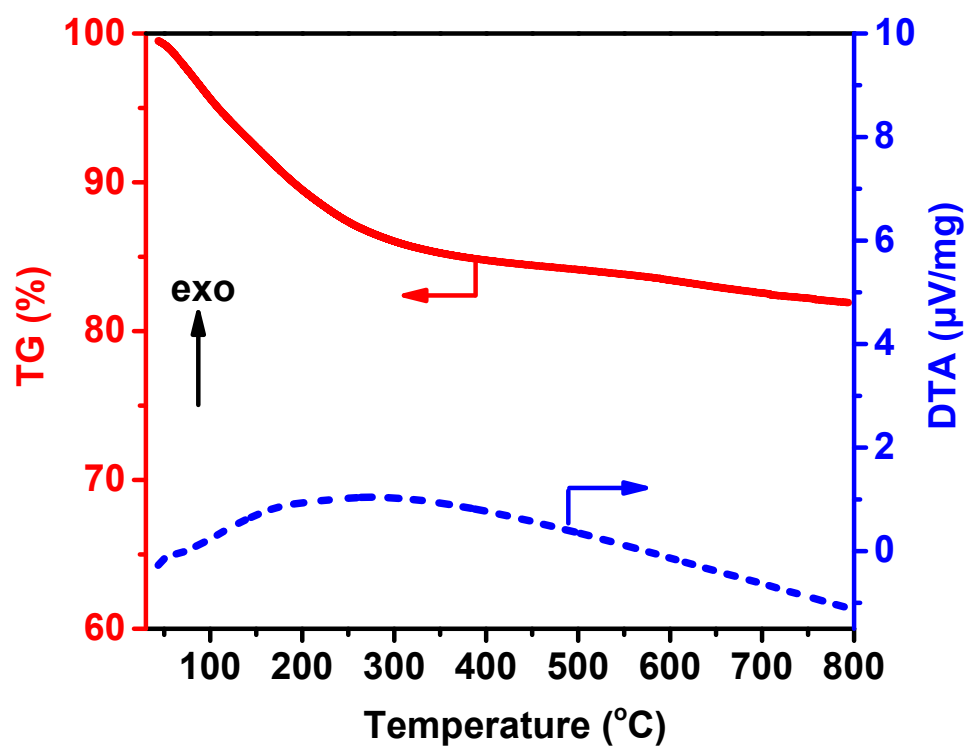

Fig. S3. TG-DTA data for the decomposition of the C3M1-R in air.

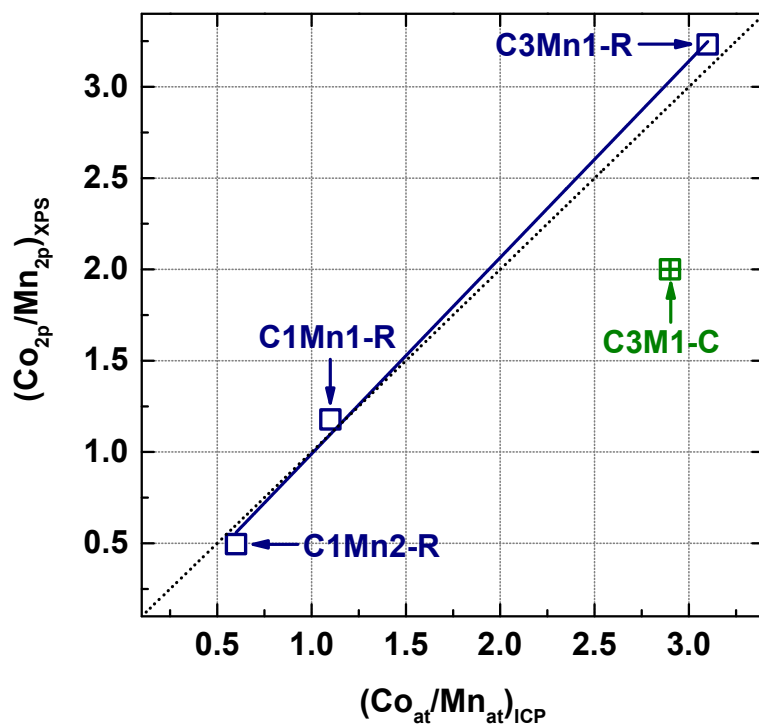

**Fig. S4.** Surface Co/Mn atomic ratio from Co 2p/Mn 2p signals (XPS) ratio vs the bulk (ICP) atomic composition of the  $\text{CoMn}_x\text{O}_y$  catalysts.

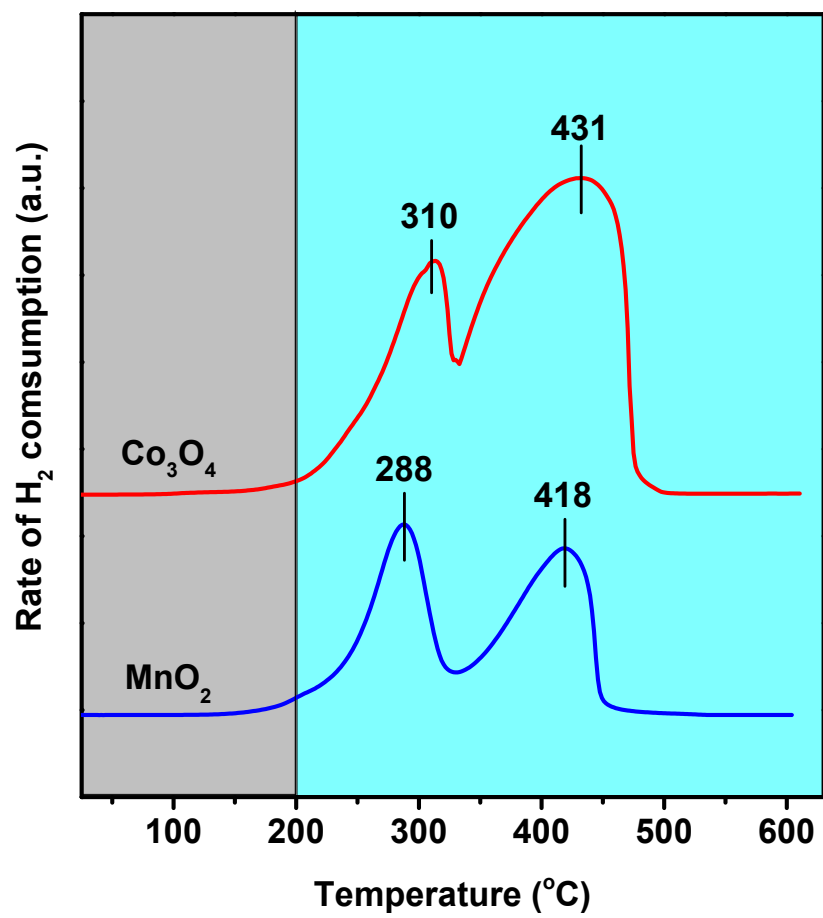

**Fig. S5.** H<sub>2</sub>-TPR profiles of the Co<sub>3</sub>O<sub>4</sub> and MnO<sub>2</sub> catalysts.



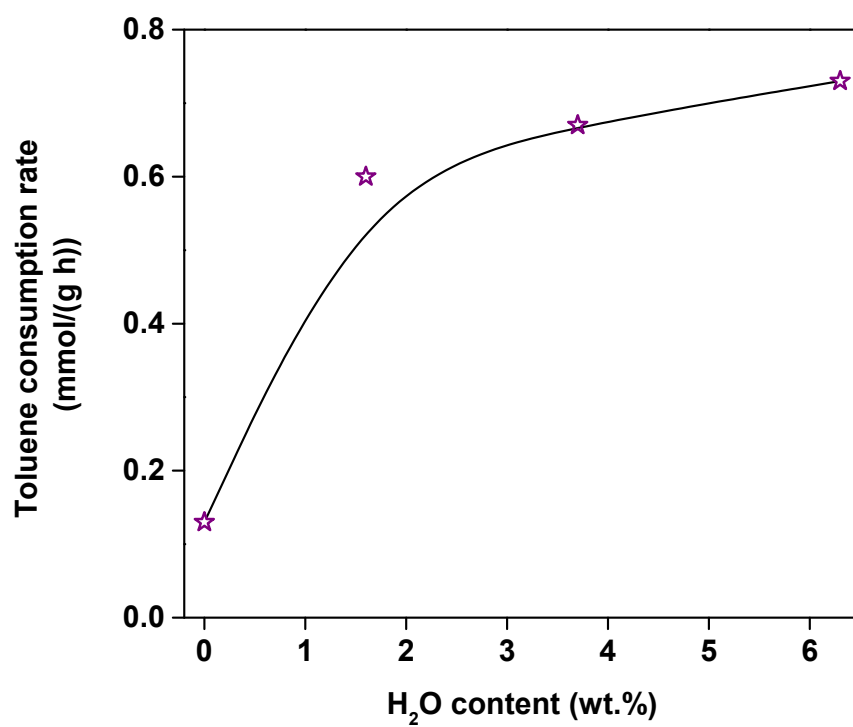

**Fig. S6.** Toluene consumption rates versus H<sub>2</sub>O content of the C3M1-R catalyst.

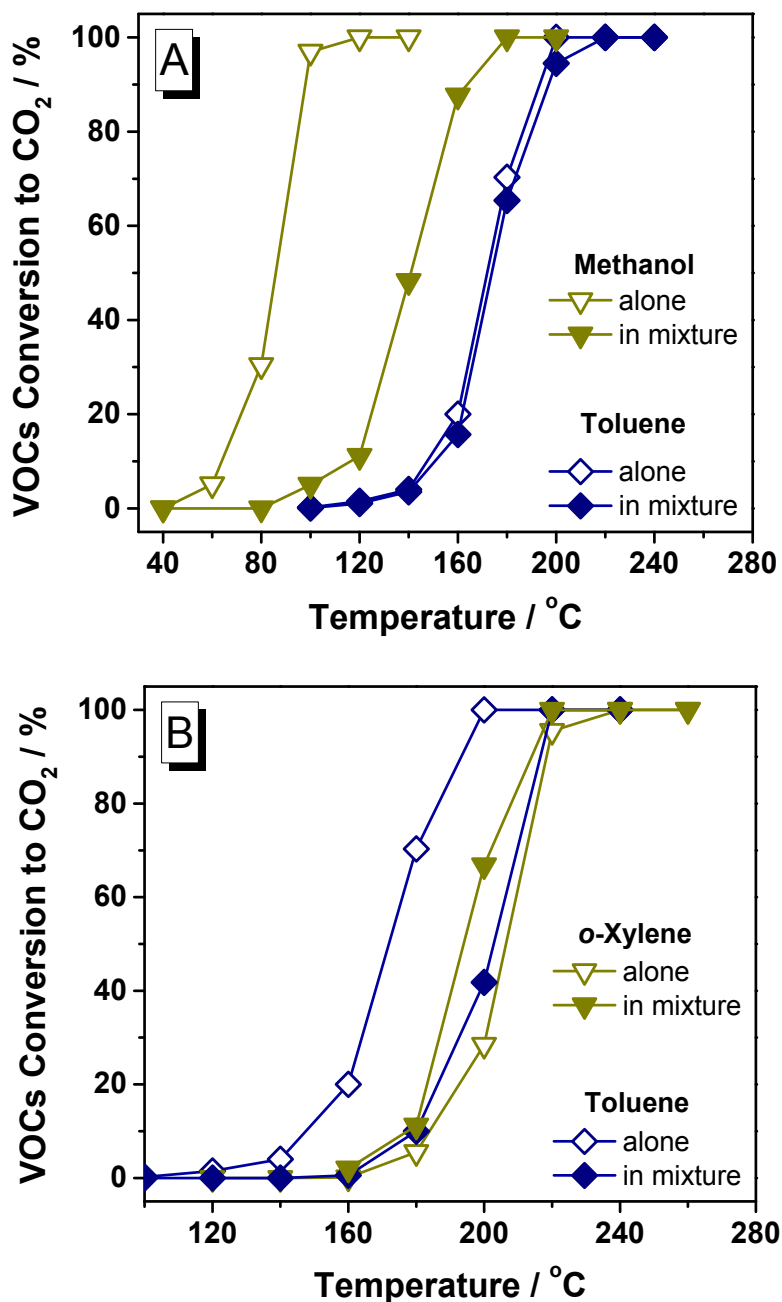

**Fig. S7.** (A) Comparison of toluene and methanol conversion alone or in mixture over the C3M1-R catalyst (Toluene alone: 500 ppm toluene/1.6 wt.% H<sub>2</sub>O/10 vol.% O<sub>2</sub>/N<sub>2</sub>; methanol alone: 1000 ppm methanol/1.6 wt.% H<sub>2</sub>O/10 vol.% O<sub>2</sub>/N<sub>2</sub>; mixture of the two VOCs: 500 ppm toluene + 1000 ppm methanol/1.6 wt.% H<sub>2</sub>O/10 vol.% O<sub>2</sub>/N<sub>2</sub>, GHSV = 67,500 h<sup>-1</sup>); (B) Comparison of toluene and *o*-xylene conversion alone or in mixture over the C3M1-R catalyst (Toluene alone: 500 ppm toluene/1.6 wt.% H<sub>2</sub>O/10 vol.% O<sub>2</sub>/N<sub>2</sub>; *o*-xylene alone: 500 ppm *o*-xylene/1.6 wt.% H<sub>2</sub>O/10 vol.% O<sub>2</sub>/N<sub>2</sub>; mixture of the two VOCs: 500 ppm toluene + 500 ppm *o*-xylene/1.6 wt.% H<sub>2</sub>O/10 vol.% O<sub>2</sub>/N<sub>2</sub>, GHSV = 67,500 h<sup>-1</sup>).
